# Supplementary material for: Disclosure of a structural milieu for the proximity ligation reveals the elusive nature of an active chromatin hub
Source: PubMed Central journal article supplement — Nucleic Acids Res. 2013 Feb 7;41(6):3563–75. doi: 10.1093/nar/gkt067 (PMC3616722; doi:10.1093/nar/gkt067), 2013-02-07
Supplement: supp_gkt067_nar-02920-v-2012-File008.pdf [file supp_gkt067_nar-02920-v-2012-File008.pdf]

# SUPPLEMENTARY FIGURES

## Figure S1

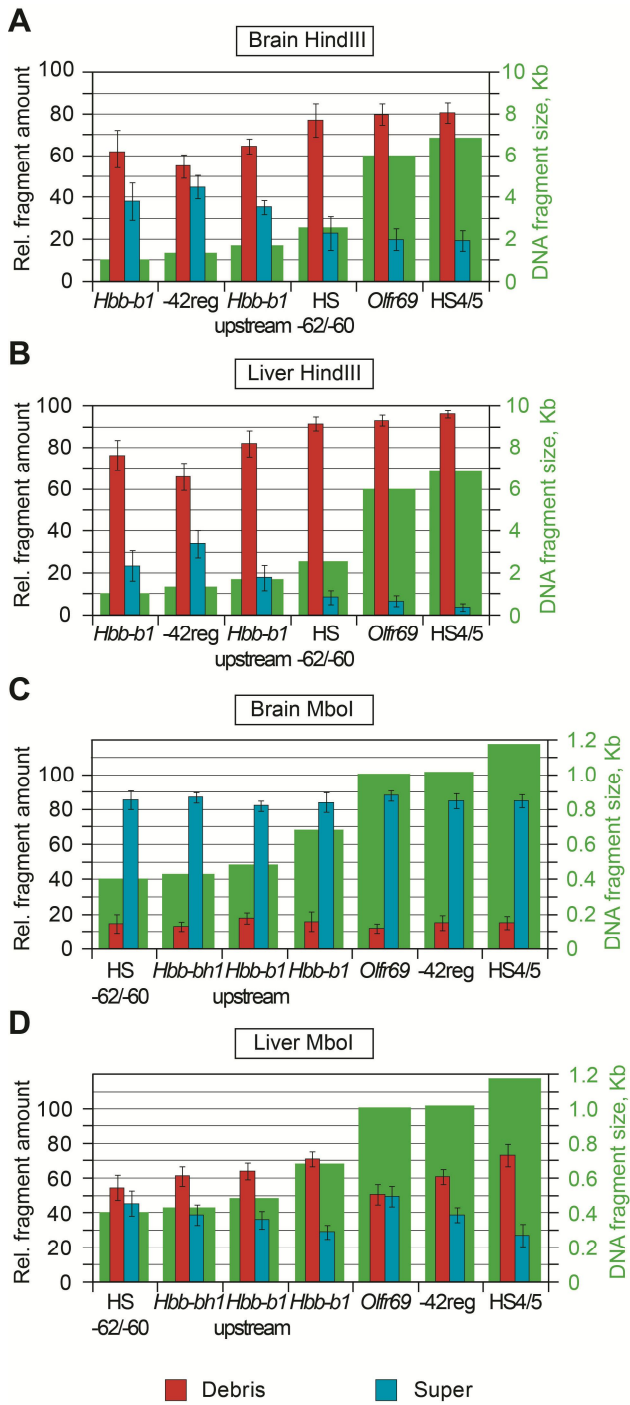

**Figure S2**

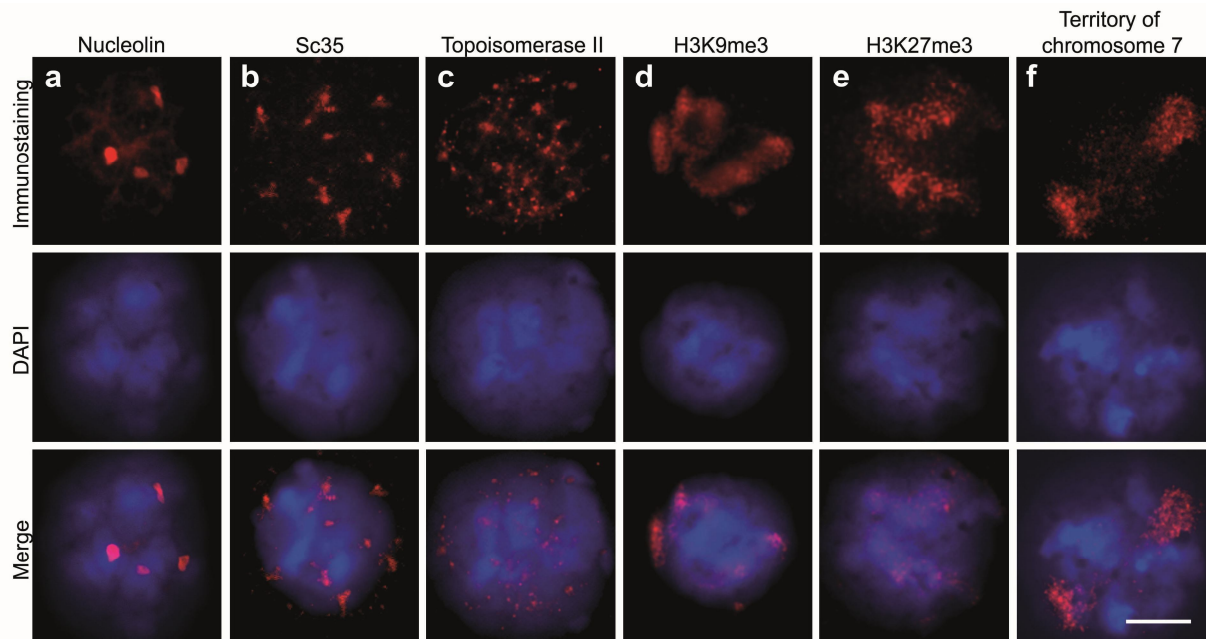

**Figure S3**

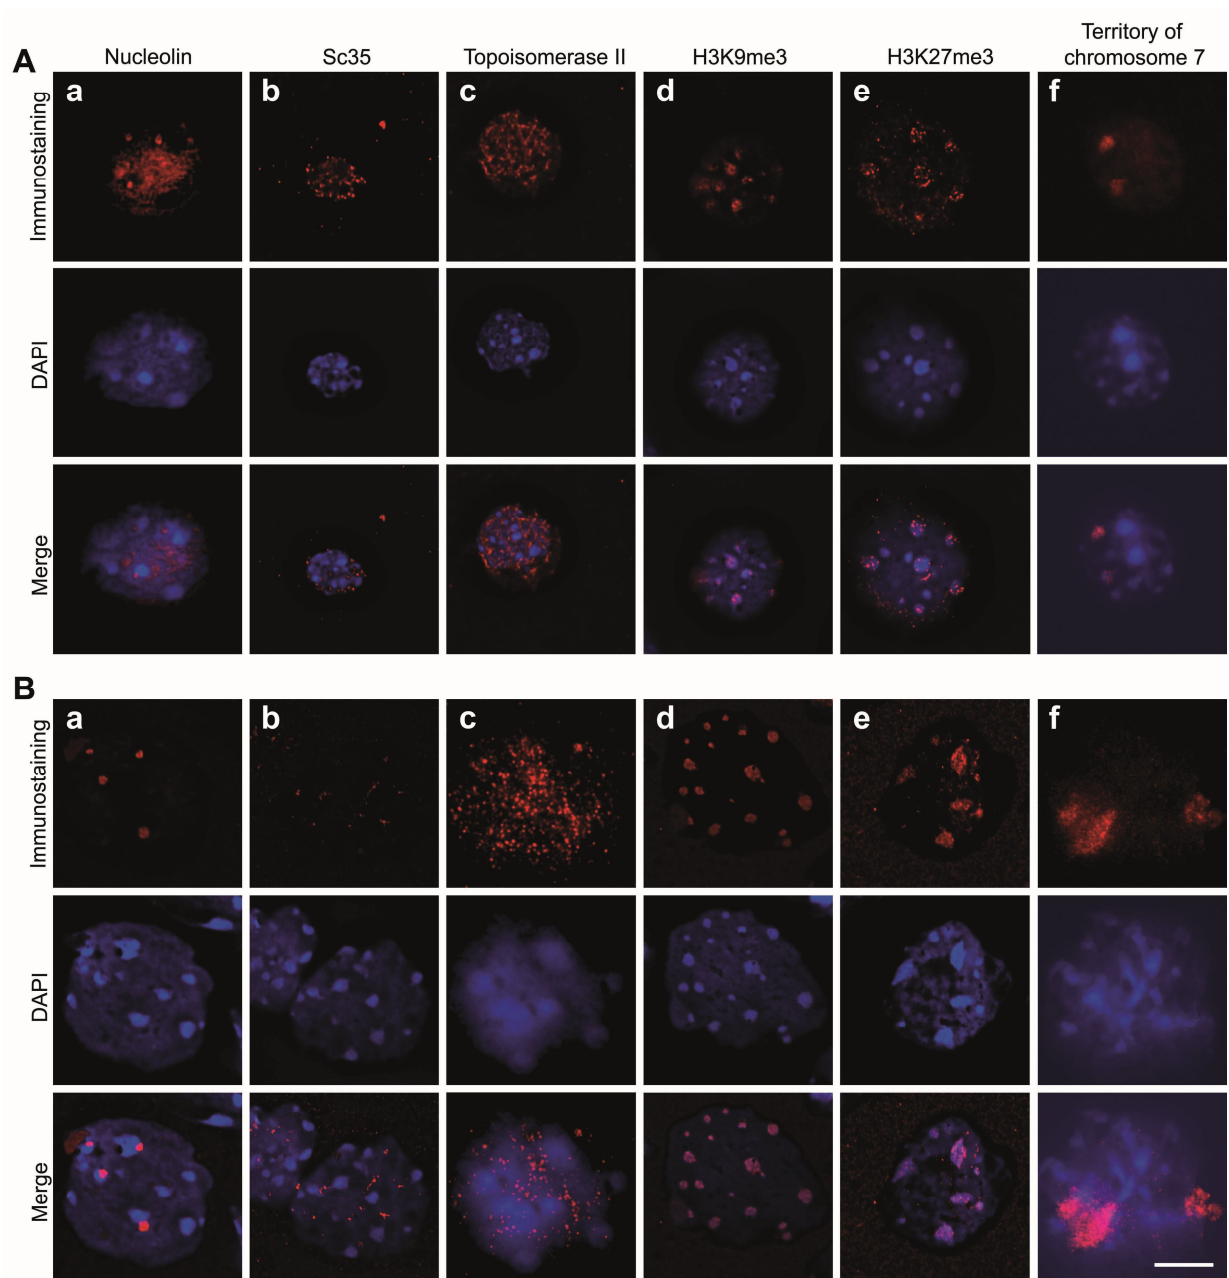

**Figure S4**

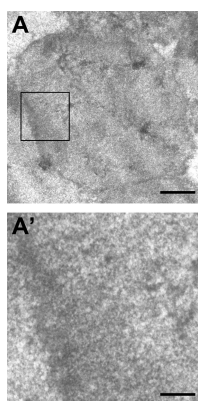

## SUPPLEMENTARY FIGURE LEGENDS

**Figure S1. Partitioning of the analyzed beta-globin gene domain restriction fragments between the soluble and the insoluble portions of the 3C material.** Shown are relative amounts of indicated fragments in the soluble (super) and insoluble (debris) fractions in experiments with brain cells and HindIII digestion (A), liver cells and HindIII digestion (B), brain cells and MboI digestion (C), and liver cells and MboI digestion (D), as determined by qPCR analysis using primers to inner regions of the restriction fragments (the sequences of the primers and TaqMan probes are presented in Supplementary Table S2). The total amount of each fragment in two fractions is set as 100. Green columns in the background of each graph show the size of the corresponding restriction fragments according to the scale shown at the right of the graph. The error bars represent SEM for two independent experiments.

**Figure S2. Visualization of nuclear compartments and chromatin domains in the insoluble 3C material obtained from liver cells using MboI digestion.** All designations are as in Figure 3.

**Figure S3. Visualization of nuclear compartments and chromatin domains in non-treated brain cells (A) and the same cells treated according to the 3C protocol up to the ligation step (B).** The insoluble fraction was collected after HindIII digestion and 1.6% SDS extraction. All designations are as in Figure 3.

**Figure S4. Electron microscopic analysis of the insoluble 3C material obtained from liver cells using MboI digestion.** All designations are as in Figure 4.

## SUPPLEMENTARY TABLES

**Table S1. Sequences of primers and TaqMan probes used for 3C analysis.** s, sense primers, a/s, antisense primers (with respect to the direction of transcription of beta-globin genes; for ERCC3 primers – transcription of *Ercc3* gene), TM, TaqMan probes.

### HindIII

| Test fragment                      | Primer/TaqMan set (5'-3')                                                                |
|------------------------------------|------------------------------------------------------------------------------------------|
| HS-62/-60                          | a/s GGGTGTGGGTATTTGTAAGAG                                                                |
| -42 region                         | a/s ATGAACAAGTTTCATGGGG                                                                  |
| HS4/5                              | a/s TTCAAGTTCTCATCCTTCACTG                                                               |
| upstream of <i>Hbb-b1</i> promoter | s AGAAGGAGATTCATCCATGCACT                                                                |
| <i>Hbb-b1</i> promoter (anchor)    | s AATCGCTGCTCCCCCTCACT<br>TM FAM-ACCAAAGAAAGAGGAAA(T-BHQ1)GACAACACAGAACA-PO <sub>4</sub> |
| <i>Olf1r69</i>                     | s ACTGCACTGTCTTCCAAATCACT                                                                |
| <i>Ercc3</i> (anchor)              | s CAGACAGTTTGCAGAGATGGC<br>TM FAM-AGCTTTATGAAG(T-BHQ1)GAACTCAAGGCAGAGG-PO <sub>4</sub>   |
| <i>Ercc3</i> (test)                | s CCCTTCTTGATAGTGATGTGACAGT                                                              |

### MboI

| Test fragment                      | Primer/TaqMan set (5'-3')                                                                |
|------------------------------------|------------------------------------------------------------------------------------------|
| HS-62/-60                          | s TGTAGTTCTCTAGTGTAGCCACCAG                                                              |
| -42 region                         | a/s TAGATGCATGGTCTTAATGGTCC                                                              |
| HS4/5                              | a/s TACTAATAAAAGCAAGCCATCTCG                                                             |
| <i>Hbb-bh1</i>                     | a/s AGATGCTTGTGATAGCTGCCTT                                                               |
| upstream of <i>Hbb-b1</i> promoter | s TGAGGACTTGGTTCAGTAAATAA                                                                |
| <i>Hbb-b1</i> promoter (anchor)    | s CTGATTCCGTAGAGCCACACC<br>TM FAM-CCTACCTCACC(T-BHQ1)TATATGCTCTGCCCTG-PO <sub>4</sub>    |
| <i>Olf1r69</i>                     | s AAAACAAGATGAGAATCGCCTG                                                                 |
| <i>Ercc3</i> (anchor)              | s CTGTCTCGTCCTGGGCAACT<br>TM FAM FAM-ATGGTTGACCACA(T-BHQ1)CTTAAACTGGGCTT-PO <sub>4</sub> |
| <i>Ercc3</i> (test)                | s C ATTCCTAGAGATTTACAACCCTCAC                                                            |

**Table S2. Sequences of primers and TaqMan probes used to estimate the quantities of restriction fragments.** s, sense primers, a/s, antisense primers (with respect to the direction of transcription of beta-globin genes), TM, TaqMan probes.

| Test fragment                      | Primer/TaqMan set (5'-3')                                                                                                     |
|------------------------------------|-------------------------------------------------------------------------------------------------------------------------------|
| HS-62/-60 (HindIII)                | s GGTATGGTGAAGTCCAGAGGG<br>TM FAM-TCCAGCAGTA(T-BHQ1)CATTCCAGCCTTAAAGAC-PO <sub>4</sub><br>a/s GTGTGCAGGGCAATAGAGGAT           |
| HS-62/-60 (MboI)                   | s ATACCCATGCTGGTTGAATCA<br>TM FAM-TGAAACC(T-BHQ1)GACGCTCCTTCCAAACTG-PO <sub>4</sub><br>a/s CCTGGTGGCTACACTAGAGAAGT            |
| -42 region                         | s TATCCCGTGACTATACCTTAATGAA<br>TM FAM-CTTGTGGAGAA(T-BHQ1)GTCATAGACTATACGAGTGAA-PO <sub>4</sub><br>a/s GCCAATGTGATGAGTGCAGAG   |
| HS4/5                              | s TACAAGTCTCCTCATGTTCCCAA<br>TM FAM-TAGCCTCAGT(T-BHQ1)ACCCGACATTAGTTCTTAGT-PO <sub>4</sub><br>a/s TTTTCAGACATACTCCTCTATCCAG   |
| <i>Hbb-bhl</i>                     | s CTATGTCTTAGGCTCCTGATTGTT<br>TM FAM-CCAAAGTGTG(T-BHQ1)CAAAGAATCTCTGAGTCCAT-PO <sub>4</sub><br>a/s GCCAGGGCAGAAGAGAGGTT       |
| upstream of <i>Hbb-b1</i> promoter | s AAAATTGAATAGAATCACTACTGCAC<br>TM FAM-AATAAGGTACA(T-BHQ1)TTGAATTGAGCATACCCTG-PO <sub>4</sub><br>a/s TGCCTCTCTATTTGTATGTGAAGT |
| <i>Hbb-b1</i> promoter             | s TCAGTAGTTGATTGAGCAAATGTGT<br>TM FAM-TCCCTCTGAA(T-BHQ1)AATGTTTGTCTTATCTGTG-PO <sub>4</sub><br>a/s TCGGTGATGACAAGCATATTTCT    |
| <i>Olf69</i>                       | s GGCAAAGCACATTTACCTGAT<br>TM 5' FAM-TCCACCCTCA(T-BHQ1)AGCATCCTCATAGCAT-PO <sub>4</sub><br>a/s ACACTTGTTCCCTGAGATGGTT         |
